## ***Perirhinal input to neocortical layer 1 controls learning***

**One Sentence Summary: *Perirhinal cortex gates memory formation in neocortical layer 1***

Guy Doron<sup>1\*†</sup>, Jiyun N. Shin<sup>1†</sup>, Naoya Takahashi<sup>1</sup>, Christina Bocklisch<sup>1</sup>, Salina Skenderi<sup>1</sup>, Moritz Drüke<sup>1</sup>, Lisa de Mont<sup>1</sup>, Maria Toumazo<sup>1</sup>, Moritz von Heimendahl<sup>2</sup>, Michael Brecht<sup>2</sup>, Richard Naud<sup>3</sup>, and Matthew E. Larkum<sup>1\*</sup>

†These authors contributed equally to this work

<sup>1</sup>*Institute for Biology, Humboldt University of Berlin, D-10117 Berlin, Germany*

<sup>2</sup>*Bernstein Center for Computational Neuroscience, Humboldt University of Berlin, D-10115 Berlin, Germany*

<sup>3</sup>*uOttawa Brain and Mind Institute, Department of Cellular and Molecular Medicine, University of Ottawa, Ottawa, Ontario, K1H 8M5, Canada*

\*Corresponding authors: Matthew E. Larkum ([matthew.larkum@hu-berlin.de](mailto:matthew.larkum@hu-berlin.de)), Guy Doron ([guydoron@gmail.com](mailto:guydoron@gmail.com))

## **Abstract**

**Signals sent back to the neocortex from the hippocampus control the long-term storage of memories in the neocortex<sup>1,2</sup>, but the cellular mechanisms underlying this process remain elusive. Here, we show that learning is controlled by specific medial-temporal input to neocortical layer 1. To show this we used direct cortical microstimulation detection task that allowed the precise region of learning to be examined and manipulated. Chemogenetically suppressing the last stage of the medial temporal loop, i.e. perirhinal cortex input to neocortical layer 1, profoundly disrupted early memory formation but had no effect on behavior in trained animals. The learning involved the emergence of a small population of layer 5 pyramidal neurons (~10%) with significantly increased firing involving high-frequency bursts of action potentials that were also blocked by suppression of perirhinal input. Moreover, we found that dendritic excitability was correspondingly enhanced in a similarly-sized population of pyramidal neurons and suppression of dendritic activity via optogenetic activation of dendrite-targeting inhibitory neurons also suppressed learning. Finally, single-cell stimulation of cortical layer 5 pyramidal neurons showed that burst but not regular firing retrieved previously learned behavior. We conclude that the medial temporal input to the neocortex controls learning through a process in L1 that elevates dendritic calcium and promotes burst firing.**

## 1 Results

2 The distributed nature of long-term memory formation in the cortex has  
3 challenged research into the underlying mechanisms. For hippocampal-  
4 independent learning paradigms there is converging evidence to suggest that  
5 cortical layer 1 (L1) is a locus for plasticity<sup>3-6</sup> involving activity in the distal tuft  
6 dendrites of pyramidal neurons that innervate L1<sup>4,7-9</sup>. Far less is known about  
7 the mechanisms underlying hippocampal-dependent memory formation in the  
8 cortex. Application of the retrograde tracer, Fast Blue, to L1 of primary  
9 somatosensory cortex (S1), revealed labeled cells in the deep layers of the  
10 perirhinal cortex (Fig. 1a, bottom left). Conversely, expression of ChR2-EYFP via  
11 a viral vector (AAV) injected into the deep layers of the perirhinal cortex densely  
12 labeled axons in L1 of S1 (Fig. 1a, bottom right), confirming that the perirhinal  
13 cortex is the last station in the medial temporal loop before the primary  
14 somatosensory neocortex in rodents (Fig. 1a, right and Extended Fig. 1)<sup>2,10,11</sup>.

15 In order to examine the influence of perirhinal cortex on memory  
16 formation in neocortex, we adapted a fast-learning, associative and cortex-  
17 dependent task<sup>12</sup>. Rodents were trained to report short (200 ms) trains of direct  
18 electrical microstimulation ( $\mu$ Stim) pulses in layer 5 (L5) of S1 (Fig. 1b) where  
19  $\mu$ Stim detection threshold is lowest<sup>12</sup>. Animals initially received a block (5  
20 repetitions) of  $\mu$ Stim paired with the reward (sweetened water) regardless of  
21 their licking responses. Following a brief pairing period (1-2 blocks), the reward  
22 became available if the animal actively licked within a response window of 100-  
23 1200 ms following  $\mu$ Stim onset (Fig. 1b). Animals learned this task extremely  
24 quickly during the first training session and became experts after about 3  
25 training sessions (see Methods). Ipsilateral injections of lidocaine in the  
26 hippocampus showed that this task is hippocampus-dependent (Extended Fig.  
27 2). Making behavior contingent on  $\mu$ Stim of S1 allowed us to precisely define the  
28 area of interest and the temporal window in order to examine the underlying  
29 neuronal mechanisms of memory formation. Moreover, it allowed us to precisely  
30 target the perirhinal projection to L1 of S1. We chose a chemogenetic approach  
31 to down-regulate synaptic transmission<sup>13</sup> at the axon terminals of perirhinal  
32 long-range projecting neurons without influencing the hippocampus and

33 parahippocampal regions. Here, we expressed hM4Di receptors (inhibitory  
34 designer receptors exclusively activated by a designer drug, DREADD<sup>14</sup>) in the  
35 perirhinal cortex of mice (Fig. 1c). The axon terminals in S1 were inhibited by  
36 application of clozapine-N-oxide (CNO, 10  $\mu$ M), injected in to L1 above the  
37 stimulated region (Fig. 1c), 20 mins before training (see Methods).

38         Specifically blocking perirhinal cortex input to L1 of S1 severely reduced  
39 learning during the first training session (Fig. 1d&e). We quantified learning as  
40 the cumulative difference between the number of successful and failed licking  
41 responses to  $\mu$ Stim ( $\Sigma[hits-misses]$ ). By this criterion, mice in which the influence  
42 of perirhinal axons on L1 of neocortex was suppressed could not associate the  
43 water reward with the  $\mu$ Stim over the first training session but rather licked in  
44 approximately 50% of the trials (average learning score  $0.48 \pm 0.06$  normalized to  
45 the total number of trials,  $n=6$  in ctrl versus  $-0.03 \pm 0.08$ ,  $n=7$  in hM4Di/CNO-  
46 treated mice; Wilcoxon rank-sum test,  $p=0.0047$ ). Note, CNO alone<sup>15</sup>, i.e. without  
47 expression of hM4Di, had no effect on learning ( $n = 3$ , Wilcoxon rank-sum test,  
48  $p=0.4$ ; Extended Fig. 2). In contrast to control animals, untrained animals rarely  
49 responded to  $\mu$ Stim ( $-0.54 \pm 0.05$ ,  $n=5$  in untrained mice, Wilcoxon rank-sum  
50 test,  $p=0.0043$ ; Fig. 1d&e). After 3 sessions, trained animals had improved  
51 learning scores ( $0.87 \pm 0.04$  at session 3, Wilcoxon rank-sum test,  $p=0.02$ ) and  
52 this was not affected by suppression of the perirhinal influence on S1 ( $0.84 \pm 0.06$ ,  
53  $n=3$  in CNO-treated trained mice, Wilcoxon sign-rank test,  $p=1$ ; Fig. 1e and  
54 Extended Fig. 2). This suggests that perirhinal cortex is involved in early memory  
55 formation but does not affect perception of the  $\mu$ Stim per se. The second order  
56 somatosensory thalamic area, POM, also projects to L1 in S1 and has been  
57 implicated in different learning paradigms<sup>3-6,16</sup>. To examine the influence of POM  
58 input in  $\mu$ Stim task, this time we expressed hM4Di receptors in POM in Gpr26-  
59 cre transgenic mice<sup>17</sup>. Suppression of this projection from POM slightly affected  
60 learning, however the effect was not significant ( $0.25 \pm 0.05$ ,  $n=7$ , Wilcoxon rank-  
61 sum test,  $p=0.18$ ; Extended Fig. 2). Taken together, these results show that the  
62 influence of the perirhinal cortex on L1 of the neocortex is crucial for learning  
63 the  $\mu$ Stim detection task.

64           The results of the chemogenetic experiments (Fig. 1) imply that activity in  
65   perirhinal cortex influences activity in S1. Since the  $\mu$ Stim electrode was most  
66   effective when placed in L5<sup>12</sup>, we reasoned that the stimulation at least affected  
67   L5 neurons. Furthermore, L5 neurons have been implicated in perceptual  
68   detection tasks and it has been recently shown that the output of these neurons  
69   depends partly on the activation of their apical dendrites that project into L1<sup>18</sup>  
70   where the perirhinal inputs arrive. We confirmed *ex vivo* that perirhinal inputs  
71   arriving in L1 synapse on to the tuft dendrites of L5 pyramids (Extended Fig. 3).  
72   To investigate the influence of PRh input in S1 activity we made juxtacellular  
73   recordings from L5 in S1 in the same region as the  $\mu$ Stim (Fig. 2a, left). We  
74   recorded activity from S1 during learning with and without chemogenetic  
75   suppression of perirhinal input to the cortical L1. As in the purely behavioral  
76   experiments (see Fig. 1), hM4Di/CNO-treated animals also did not learn the task  
77   over the first session ( $0.1 \pm 0.04$ ,  $n=4$ , Wilcoxon rank-sum test against control,  
78    $p=0.04$ ). Both the baseline (1 s before  $\mu$ Stim) and post-stimulus (0.5-2.5 s after  
79    $\mu$ Stim) AP firing rates in L5 pyramidal neurons of these animals ( $n=4$ , 52 cells,  
80   826 trials) was significantly reduced in comparison to control animals ( $n=2$ , 28  
81   cells, 706 trials) treated with CNO only (Wilcoxon rank-sum test,  $p<0.001$  for  
82   both baseline and post-stimulus; Fig. 2b-d). These results refer to ‘Hit’ trials  
83   where the animals responded correctly to  $\mu$ Stim although we found analogous  
84   results in ‘Miss’ trials (Extended Fig. 3). There was no significant difference in  
85   firing rate in control animals between baseline and post-stimulus activity and a  
86   slight but significant reduction in hM4Di/CNO-treated animals (see also  
87   Extended Fig. 3).

88           Previously, we found that animals are biased to respond to irregular firing  
89   patterns in animals trained on a  $\mu$ Stim task<sup>19</sup> and that burst firing correlates with  
90   perceptual detection<sup>18</sup>. We therefore examined burst firing of the same cells  
91   during learning in control and hM4Di/CNO-treated animals where learning was  
92   blocked. Here, we found that blocking of learning via suppression of perirhinal  
93   input significantly decreased both baseline and post-stimulus burst rate  
94   (Wilcoxon rank-sum test,  $p<0.001$ ). Interestingly, the burst rate following  $\mu$ Stim  
95   compared to baseline was greatly increased in control animals (Wilcoxon sign-

96 rank test,  $p=0.001$ ) but not in hM4Di/CNO-treated animals and only in ‘Hit’ trials  
97 (see Extended Fig. 3). We conclude that perirhinal input to L1 mediates learning-  
98 related increases in excitability and burst firing in neocortical L5 neurons.

99       What information does perirhinal cortex convey during  $\mu$ Stim learning?  
100 To investigate this, we examined the firing of deep layer neurons in perirhinal  
101 cortex (Fig. 2a, right). We found that perirhinal neurons responded robustly to  
102 hit trials but not to miss trials after  $\mu$ Stim in S1 (Fig. 2f&g;  $n=6$  animals,  $n=287$   
103 trials in 28 neurons; firing rate: miss  $-8\pm 11.2\%$  versus hit  $30.9\pm 11.2\%$ ,  $p<0.001$ ,  
104 Wilcoxon rank-sum test). Moreover, the responses in perirhinal cortex included  
105 an increase in burst rate compared to baseline only during hit trials (Wilcoxon  
106 sign-rank test.  $p<0.001$ ). However, the relative change of burst rate between  
107 miss and hit trials was not significant (Fig. 2f&g; burst rate miss  $14 \pm 21\%$  versus  
108 hit  $55.9\pm 22.3\%$ ,  $p=0.1$ , Wilcoxon rank-sum test). This shows that the perirhinal  
109 cortex signals information related to ‘Hit’ trials primarily via increased AP firing  
110 during learning.

111       It has recently been shown that memory formation is accompanied by an  
112 increase in slow cortical oscillations<sup>20-23</sup>. We therefore also analyzed the local  
113 field potential (LFP) signals, taken from the same recordings in S1 and perirhinal  
114 cortex to assess cortical oscillations during learning. Theta power (4 - 8 Hz) in S1  
115 was significantly higher in trained versus untrained animals (Extended Fig. 4;  
116 Wilcoxon rank-sum test,  $p<0.0001$ ). Analogously, in perirhinal cortex, we found a  
117 significant increase in the theta power in ‘Hit’ compared to ‘Miss’ trials during  
118 learning (Extended Fig. 4; Wilcoxon rank-sum test,  $p=0.002$ ). These results  
119 suggest that elevated theta power in perirhinal cortex correlates to a transition  
120 to elevated theta in response to  $\mu$ Stim in S1 in expert animals.

121       Depolarization of the apical dendrites in L5 pyramidal neurons is shown  
122 to reliably lead burst firing behaviour<sup>24-26</sup>. Since learning correlated with an  
123 increase in burst firing in these neurons (Fig. 2e) that was dependent on  
124 perirhinal input to L1, we hypothesized that the mechanism of learning-induced  
125 bursting might involve an enhancement of synaptic influence to the tuft  
126 dendrites. We therefore examined  $Ca^{2+}$ -dependent activity in the apical

127 dendrites of L5 neurons in S1 using 2-photon microscopy in trained animals. To  
128 do this, we expressed GCaMP6f in Rbp4-Cre transgenic mice<sup>27</sup> and imaged at a  
129 depth of  $\sim 200$   $\mu\text{m}$ , the region of the apical dendrite known for initiation of  
130 dendritic  $\text{Ca}^{2+}$  activity<sup>7</sup> (Fig. 3a-c). Calcium transients measured from 1 s before  
131 the  $\mu\text{Stim}$  until 3 s after the  $\mu\text{Stim}$  in 318 dendrites (Fig. 3d;  $n = 4$  mice), revealed  
132 three populations with distinct fluorescence profiles (Fig. 3e). A small population  
133 (10%, “ON” dendrites) of dendrites showed substantial increases in fluorescence  
134 following  $\mu\text{Stim}$  with another population (37%, “OFF” dendrites) of dendrites  
135 showing reduced  $\text{Ca}^{2+}$  fluorescence. The rest were not responsive to  $\mu\text{Stim}$  (53%,  
136 “NR” dendrites).

137 We found similarly distinct and stereotypical output firing patterns in L5  
138 neurons using juxtacellular recordings from trained animals (Fig. 3f; see  
139 Extended Fig. 5 for examples). In 11% of cells we saw a sudden and marked  
140 increase in firing ( $21.44 \pm 42.16$  Hz) briefly following  $\mu\text{Stim}$  (Fig. 3f; L5 “ON”  
141 cells). In another population consisting of 40% of neurons, there was a decrease  
142 in firing ( $-6.39 \pm 4.93$  Hz) immediately following the  $\mu\text{Stim}$  (Fig. 3f; L5 “OFF”  
143 cells). In most of the cells (49%), we observed no response to  $\mu\text{Stim}$  (L5 “NR”  
144 cells). Interestingly, the baseline firing rate in L5 ON and L5 OFF cells was  
145 significantly higher than in NR cells (Wilcoxon rank-sum test, NR vs. ON:  $p <$   
146  $0.0001$ , NR vs. OFF:  $p < 0.0001$ ). In contrast to expert animals, we observed low  
147 firing rates over all neurons in untrained animals (Extended Fig. 6). Most L5  
148 neurons in untrained animals did not respond to  $\mu\text{Stim}$  at all (95%,  $n=63/66$   
149 cells) with a small population (5%,  $n=3/66$  cells) responding with a small  
150 increase ( $6.9 \pm 6.30$  Hz) briefly after  $\mu\text{Stim}$ . Taken together with the 2-photon  
151 dendritic recordings, we conclude that learning enhances the responsiveness of a  
152 small population of L5 pyramidal neurons to apical dendritic input.

153 To test whether dendritic activity influences learning, we optogenetically  
154 activated dendrite-targeting inhibitory neurons during the  $\mu\text{Stim}$  training.  
155 Previous studies have implicated somatostatin (SST) positive interneurons in  
156 suppressing plasticity and learning via dendritic inhibition<sup>5,6,8,28,29</sup>. We reasoned  
157 that if the same circuitry is activated during the  $\mu\text{Stim}$  detection task, activating  
158 SST neurons with channelrhodopsin2 (ChR2) should also impair learning. We



159 activated SST neurons during training in SST::ChR2 mice using a 500 ms light  
160 pulse starting 300 ms before  $\mu$ Stim (Fig. 3g). This abolished learning in a manner  
161 almost identical to removing the influence of perirhinal input to L1 (SST:  $-0.16 \pm$   
162  $0.05$ , Wilcoxon rank-sum test,  $p=0.002$ ; Fig. 3h&i). Notably, continued activation  
163 of SST neurons through subsequent training sessions prevented learning over  
164 several sessions, unlike block of perirhinal input in which the animals eventually  
165 became experts (Extended Fig. 7). Altogether these results suggest that the  
166 emergence of a population of neurons underlying learned behavior in the  $\mu$ Stim  
167 task depends on a dendritic mechanism.

168         The correlation between both bursting and dendritic activity with  
169 learning suggests that bursting might underlie memory retrieval in cortical  
170 neurons. In order to test this hypothesis we devised another learning paradigm  
171 in which we first trained animals to respond expertly to  $\mu$ Stim and then  
172 manipulated the firing of single neurons in S1 using single-cell stimulation  
173 (“nanostimulation”<sup>12,19,30</sup>) via a juxtacellular electrode (Fig. 4a). Expert animals  
174 were significantly more likely to lick for reward if bursts of APs (80–120 Hz)  
175 were elicited in a single L5 pyramidal neuron of S1 compared to false-positive  
176 trials where no current was injected. However, response rate to a train of  
177 regularly spiking APs (30–50 Hz) was not significantly different from false-  
178 positive rate (Fig. 4b&c; Hit rate; false-positive:  $25.94 \pm 3.6\%$ , regular:  
179  $28.11 \pm 4.07\%$ , burst:  $31.47 \pm 4.24\%$ ,  $n=27$  cells, one-sided paired t-test,  $p=0.03$ ).  
180 This indicated that burst firing increased the downstream readout of the firing of  
181 a single L5 pyramidal neuron leading to successful behavior. Since the learned  
182 behavior could be recovered by burst firing in single pyramidal neurons, these  
183 data suggest that burst firing observed in L5<sup>ON</sup> neurons might be extremely  
184 effective in memory recall.

185         Overall, we have shown that the perirhinal connection to L1 of neocortex  
186 is crucial for learning a  $\mu$ Stim detection task and involves the conversion of  
187 neurons in neocortex to high-firing, burst mode correlated with an increase in  
188 dendritic activity (Fig. 4d). This implies that the apical dendrites of L5 neurons  
189 are the locus of plasticity related to memory consolidation. This idea is  
190 corroborated by our previous study where we showed that stimulus detection in



191 S1 was dependent on dendritic activity in trained animals<sup>18</sup> and was disrupted  
192 by inhibiting this activity. In addition, dendritic activity is shown to be generated  
193 by feedback signals from other cortical areas<sup>7,9</sup> and is enhanced during  
194 learning<sup>31</sup>, suggesting that perirhinal input to L1 might serve as a gating signal  
195 for the enhancement of cortico-cortical feedback inputs (Fig. 4d). We conclude  
196 that the medial temporal input to the neocortex controls learning through a  
197 process in L1 that is encoded by dendritic calcium promoting burst firing as the  
198 neural signature of memory recall.

199

200

201

202

203

204

205

206

207

208

209

210

211

212

213

214

215

216

217

218 **References**

- 219 1. Eichenbaum, H. A cortical–hippocampal system for declarative memory.  
220 *Nat. Rev. Neurosci.* **1**, 41–50 (2000).
- 221 2. Rolls, E. T. A computational theory of episodic memory formation in the  
222 hippocampus. *Behavioural Brain Research* **215**, 180–196 (2010).
- 223 3. Letzkus, J. J. *et al.* A disinhibitory microcircuit for associative fear learning  
224 in the auditory cortex. *Nature* **480**, 331–335 (2011).
- 225 4. Gambino, F. *et al.* Sensory-evoked LTP driven by dendritic plateau  
226 potentials in vivo. *Nature* **515**, 116–119 (2014).
- 227 5. Abs, E. *et al.* Learning-Related Plasticity in Dendrite-Targeting Layer 1  
228 Interneurons. *Neuron* **100**, 684–699 (2018).
- 229 6. Williams, L. E. & Holtmaat, A. Higher-Order Thalamocortical Inputs Gate  
230 Synaptic Long-Term Potentiation via Disinhibition. *Neuron* **101**, 91–102  
231 (2019).
- 232 7. Xu, N. L. *et al.* Nonlinear dendritic integration of sensory and motor input  
233 during an active sensing task. *Nature* **492**, 247–251 (2012).
- 234 8. Cichon, J. & Gan, W.-B. Branch-specific dendritic Ca<sup>2+</sup> spikes cause  
235 persistent synaptic plasticity. *Nature* **520**, 180–185 (2015).
- 236 9. Manita, S. *et al.* A Top-Down Cortical Circuit for Accurate Sensory  
237 Perception. *Neuron* **86**, 1304–1316 (2015).
- 238 10. Witter, M. P. & Groenewegen, H. J. Connections of the parahippocampal  
239 cortex in the cat. III. Cortical and thalamic efferents. *J. Comp. Neurol.* **252**,  
240 1–31 (1986).
- 241 11. Agster, K. L. & Burwell, R. D. Cortical efferents of the perirhinal, postrhinal,  
242 and entorhinal cortices of the rat. *Hippocampus* **19**, 1159–1186 (2009).

- 243 12. Houweling, A. R. & Brecht, M. Behavioural report of single neuron  
244 stimulation in somatosensory cortex. *Nature* **451**, 65–68 (2008).
- 245 13. Stachniak, T. J., Ghosh, A. & Sternson, S. M. Chemogenetic Synaptic  
246 Silencing of Neural Circuits Localizes a Hypothalamus→Midbrain Pathway  
247 for Feeding Behavior. *Neuron* **82**, 797–808 (2014).
- 248 14. Armbruster, B. N., Li, X., Pausch, M. H., Herlitze, S. & Roth, B. L. Evolving the  
249 lock to fit the key to create a family of G protein-coupled receptors  
250 potently activated by an inert ligand. *Proc. Natl. Acad. Sci. U. S. A.* **104**,  
251 5163–8 (2007).
- 252 15. Gomez, J. L. *et al.* Chemogenetics revealed: DREADD occupancy and  
253 activation via converted clozapine. *Science* **357**, (2017).
- 254 16. Audette, N. J., Bernhard, S. M., Ray, A., Stewart, L. T. & Barth, A. L. Rapid  
255 Plasticity of Higher-Order Thalamocortical Inputs during Sensory  
256 Learning. *Neuron* **103**, 277-291 (2019).
- 257 17. Oram, T. B., Ahissar E. & Yizhar, O. Head-motion modulation of the activity  
258 of optogenetically tagged neurons in the vibrissal thalamus. *Soc Neuro*  
259 *Abstr* 736.15 (2015).
- 260 18. Takahashi, N., Oertner, T. G., Hegemann, P. & Larkum, M. E. Active cortical  
261 dendrites modulate perception. *Science* **354**, 1587–1590 (2016).
- 262 19. Doron, G., von Heimendahl, M., Schlattmann, P., Houweling, A. R. & Brecht,  
263 M. Spiking Irregularity and Frequency Modulate the Behavioral Report of  
264 Single-Neuron Stimulation. *Neuron* **81**, 653–663 (2014).
- 265 20. Clouter, A., Shapiro, K. L. & Hanslmayr, S. Theta Phase Synchronization Is  
266 the Glue that Binds Human Associative Memory. *Curr. Biol.* **27**, 3143-3148  
267 (2017).

- 268 21. Parish, G., Hanslmayr, S. & Bowman, H. The Sync/deSync Model: How a  
269 Synchronized Hippocampus and a Desynchronized Neocortex Code  
270 Memories. *J. Neurosci.* **38**, 3428–3440 (2018).
- 271 22. Schreiner, T., Doeller, C. F., Jensen, O., Rasch, B. & Staudigl, T. Theta Phase-  
272 Coordinated Memory Reactivation Reoccurs in a Slow-Oscillatory Rhythm  
273 during NREM Sleep. *Cell Rep.* **25**, 296–301 (2018).
- 274 23. Hanslmayr, S., Axmacher, N. & Inman, C. S. Modulating Human Memory via  
275 Entrainment of Brain Oscillations. *Trends Neurosci.* **42**, 485–499 (2019).
- 276 24. Williams, S. R. & Stuart, G. J. Mechanisms and consequences of action  
277 potential burst firing in rat neocortical pyramidal neurons. *J. Physiol.* **521**,  
278 467–482 (1999).
- 279 25. Larkum, M. E., Zhu, J. J. & Sakmann, B. A new cellular mechanism for  
280 coupling inputs arriving at different cortical layers. *Nature* **398**, 338–341  
281 (1999).
- 282 26. Larkum, M. E. & Zhu, J. J. Signaling of layer 1 and whisker-evoked Ca<sup>2+</sup> and  
283 Na<sup>+</sup> action potentials in distal and terminal dendrites of rat neocortical  
284 pyramidal neurons in vitro and in vivo. *J. Neurosci.* **22**, 6991–7005 (2002).
- 285 27. Gerfen, C. R., Paletzki, R. & Heintz, N. GENSAT BAC Cre-Recombinase  
286 Driver Lines to Study the Functional Organization of Cerebral Cortical and  
287 Basal Ganglia Circuits. *Neuron* **80**, 1368–1383 (2013).
- 288 28. Makino, H. & Komiyama, T. Learning enhances the relative impact of top-  
289 down processing in the visual cortex. *Nat. Neurosci.* **18**, 1116–1122  
290 (2015).
- 291 29. Chen, S. X., Kim, A. N., Peters, A. J. & Komiyama, T. Subtype-specific  
292 plasticity of inhibitory circuits in motor cortex during motor learning. *Nat.*

293            *Neurosci.* **18**, 1109–1115 (2015).

294    30.    Houweling, A. R., Doron, G., Voigt, B. C., Herfst, L. J. & Brecht, M.

295            Nanostimulation: manipulation of single neuron activity by juxtacellular

296            current injection. *J. Neurophysiol.* **103**, 1696–1704 (2010).

297    31.    Miyamoto, D. *et al.* Top-down cortical input during NREM sleep

298            consolidates perceptual memory. *Science* **352**, 1315–1318 (2016).

299

300

301

302

303

304

305

306

307

308

309

310

311

312

313

314

315

316

317

318

319

320 **Methods**

321 **Animals.** All experiments and procedures were approved and conducted in  
322 accordance with the guidelines given by Landesamt für Gesundheit und Soziales  
323 Berlin. The following animal lines were used in this study: C57BL/6J wild-type  
324 mice, Gpr26-cre transgenic mice<sup>17</sup>, SST::ChR2 transgenic mice (SST-IRES-Cre  
325 mice (JAX stock #018973) were crossed with Ai32 mice (JAX stock #024109) )<sup>32</sup>  
326 Rbp4-cre transgenic mice<sup>27</sup> and Wistar rats (Charles River). Male animals were  
327 used except for 2 Rbp4-cre mice. The animals were housed in reversed 12 h  
328 light/dark cycle (light on between 21:00 and 09:00) and all the behavioral  
329 experiments were performed during dark period of the cycle.

330

331 **Retrograde and anterograde tracing.** For the retrograde labeling of S1  
332 projecting perirhinal neurons, Fast Blue (25% in dH<sub>2</sub>O, Polysciences) soaked in a  
333 sterile piece of tissue was applied onto the surface of S1 for 10 min. Incubation  
334 time was 7 days before transcardial perfusion. For anterograde tracing and  
335 optogenetic *ex-vivo* experiments AAV-hSyn-hChR2(H134R)-EYFP (Penn Vector  
336 Core) was injected in the PRh of > 2 weeks old C57/BL6 mice. Anesthesia was  
337 induced and maintained with isoflurane at 5% and 2%, respectively. Mice were  
338 placed in a stereotaxic frame and craniotomies were performed using stereotaxic  
339 coordinates: anterior-posterior axis (AP) -1.8 mm, medial-lateral axis (ML)  $\pm$  4.1  
340 mm, DV -4.2 mm from bregma. Injections were carried out using graduated  
341 pipettes broken back to a tip diameter of 10-15  $\mu$ m, at a rate of  $\sim$  0.025  $\mu$ l/min  
342 for a total volume of 0.05-0.07  $\mu$ l. Incubation time was at least 3 weeks before  
343 transcardial perfusion or *ex-vivo* experiment.

344

345 **YFP fluorescence analysis.** AAV-hSyn-hChR2(H134R)-EYFP containing acute  
346 brain sections were imaged using an Olympus BX51 Microscope with a 4x  
347 objective. Fluorescence intensity was quantified with ImageJ software by  
348 plotting a line profile across the cortical layers that calculates the brightness  
349 value. The average gray value of all images was then normalized to the negative  
350 SEM of the lowest grey value across the average line profile.

351

352 **Ex-vivo electrophysiology.** After 3-4 weeks of virus expression, sagittal or  
353 coronal slices (300  $\mu$ m thick) were prepared from 35-50 day old C57/BL6 mice.  
354 Whole-cell patch-clamp recordings were performed from visually identified  
355 layer-5 pyramidal neurons using infrared (IR) Dotd-gradient contrast video  
356 microscopy. The extracellular solution contained 125 mM NaCl, 25 mM NaHCO<sub>3</sub>,  
357 25 mM Glucose, 3 mM KCl, 1.25 mM NaH<sub>2</sub>PO<sub>4</sub>, 2 mM CaCl<sub>2</sub>, 1 mM MgCl<sub>2</sub>, pH 7.4  
358 at  $\sim$ 33 °C. The intracellular solution contained 115 mM K<sup>+</sup>-gluconate, 20 mM  
359 KCl, 2 mM Mg-ATP, 2 mM Na<sub>2</sub>-ATP, 10 mM Na<sub>2</sub>-phosphocreatine, 0.3 mM GTP,  
360 10 mM HEPES, 0.05 mM Alexa 594 and biocytin (0.2%), pH 7.2. Whole-cell  
361 voltage recordings were performed from the soma (4-6 M $\Omega$ ) using a Multiclamp  
362 700b (Molecular devices) amplifier. Data was acquired with an ITC-18 board and  
363 analyzed using Igor software. Optogenetic synaptic stimulation was performed  
364 via an LED (470 nm) (2 ms pulses) located in L1 around the tuft dendrite. To  
365 activate hM4D<sub>i</sub> receptor, Clozapine-N-Oxide (CNO) (Tocris Bioscience) was bath  
366 applied (final concentration 10  $\mu$ M).

367

368 **Chemogenetic manipulation of PRh axonal activity.** Mice (> 4 weeks) were  
369 anesthetized with ketamine/xylazine (13 mg kg<sup>-1</sup>/1mg kg<sup>-1</sup>) by intraperitoneal



370 injection (i.p.). Animals were kept on a thermal blanket during entire surgery  
371 and recovery. Lidocaine (1%, wt/vol, AlleMan Pharma) was injected around the  
372 surgical site before the scalp incision. The periosteum was removed and small  
373 craniotomy was made on the injection sites. Injection coordinates for PRh were  
374 AP -1.8 mm, ML  $\pm$  4.2 mm, DV -4.2 mm and for POm were AP -2 mm, ML +1.2  
375 mm, DV -3.0 mm from bregma. AAV1/2-hSyn1-hM4D(Gi)-mCherry-WPRE-  
376 hGHp(A) (Viral Vector Facility of the University of Zurich) was injected either  
377 bilaterally (n=16 for PRh and n=7 for Pom) or unilaterally (n=3 for PRh) (0.15 –  
378 0.20  $\mu$ l per side). Further experiments were performed after 3 weeks of  
379 expression.

380 In order to activate hM4Di receptor, CNO dissolved in extracellular  
381 solution (10  $\mu$ M) was applied into superficial layers of S1 (initial depth at 150  
382  $\mu$ m and over the day injection pipette was advanced (up to 300  $\mu$ m) in order to  
383 compensate tissue growth on the craniotomy) at least 20 min before the  
384 microstimulation training. CNO was applied into two adjacent sites (150  $\mu$ l each)  
385 of the craniotomy to maximize the CNO diffusion area.

386

387 **Headpost implant and head-restraint habituation.** A lightweight aluminum  
388 head-post (mouse) or a metal bolt (rat) was implanted on the skull of the animal  
389 under ketamine/xylazine anaesthesia (13 mg kg<sup>-1</sup>/1mg kg<sup>-1</sup> for mice, 100 mg kg<sup>-1</sup>  
390 <sup>1</sup>/ 5 mg kg<sup>-1</sup> for rats, i.p.). For mice used in chemogenetic experiments, the  
391 implantation was performed > 10 days after viral injection. After the scalp and  
392 periosteum were removed, a thin layer of light curing adhesives (OptiBond, Kerr  
393 and Charisma, Kulzer) was applied to the skull. A head-post was fixed on the  
394 skull on the left hemisphere with a dental cement (Paladur, Heraeus Kulzer).

395           Head-restraint habituation began > 3 days after the head-post  
396   implantation. Habituation time at the first day was 5 min and then gradually  
397   increased each day until the animal sat calmly for 1 h. Animals were water  
398   restricted from the second day (1 ml/day) of the habituation and then trained to  
399   receive the saccharin (Sigma-Aldrich) water (0.5% for mice and 0.1% for rats)  
400   from the licking port. Licking was monitored using a piezo-based sensor attached  
401   to the licking port. Weight and health of the animal were monitored daily.  
402   Habituation for head restraint and licking typically took 5 days.

403           Two to three days before the microstimulation training or/and  
404   juxtacellular recording, 1.5 mm x 1.5 mm craniotomy was made on the right  
405   barrel cortex centered at AP 1.25 mm and ML 3.75 mm from bregma for mice  
406   and AP 2.5 mm and ML 5.5 mm from bregma for rats. For perirhinal cortex  
407   recording in rats, craniotomy was made on AP 4.5 mm and ML 5.0 mm from  
408   bregma. Then a recording chamber was implanted for chronic access to this  
409   region. The dura was left intact and the craniotomy was covered with silicon  
410   (Kwik-Cast, World Precision Instruments).

411

412   **Optogenetic manipulations.** For optogenetic activation of SST neurons,  
413   SST::ChR2 transgenic mice that express ChR2 in SST-positive cells were used.  
414   Photostimulation light (465 nm, 2 mW, 500-ms pulse starting at 300 ms before  
415   stimulus onset) was delivered via the optic fiber placed above the craniotomy.  
416   To prevent the mice from distinguishing photostimulation trials from control  
417   trials using visual cues, the recording chamber was covered with a black rubber  
418   to prevent light leakage from photostimulation into the animals' eyes.

419

420 **Microstimulation detection task.** Animals were trained to perform  
421 microstimulation task as described elsewhere<sup>12,19,33</sup>. Briefly, animals were  
422 trained to respond with tongue lick to a 200 ms train of microstimulation pulses  
423 applied to barrel cortex (40 cathodal pulses at 200Hz, 0.3 ms pulse duration)  
424 through a tungsten microelectrode (Microprobes) in depth of ~700  $\mu\text{m}$  (mice) or  
425 ~1500  $\mu\text{m}$  (rats) from pia and presented at random intervals. In the first session,  
426 initial intensity of 160  $\mu\text{A}$  pulses were injected into the cortex and paired with a  
427 drop of water reward (pairing period). After 5 pairings, testing began where  
428 animals were rewarded only if they lick the licking port within 100 to 1,200 ms  
429 after stimulus onset. Tongue lick responses were detected with piezo-based  
430 sensor (mice) or beam breaker (rats). The time of the first lick after stimulus  
431 onset was taken as the reaction time. To encourage animals to use a  
432 nonconservative response criterion, we only mildly punished licks in the  
433 interstimulus interval with an additional 1.5 s delay to the next stimulus  
434 presentation. Once animals reached 80% hit rate, pulse intensity was gradually  
435 decreased during and over the sessions until it reached 10  $\mu\text{A}$  (mice) or 5  $\mu\text{A}$   
436 (rats). Control mice reached to 10  $\mu\text{A}$  within 3-5 days of training. Expert in this  
437 study means animals who performed the task with >80% hit rate at the 10  $\mu\text{A}$   
438 (mice) or 5  $\mu\text{A}$  (rats).

439

440 ***In vivo* juxtacellular recording.** Following head-restraint habituation,  
441 juxtacellular recordings were performed from deep layer neurons from S1 and  
442 PRh in awake head-fixed animals during  $\mu\text{Stim}$  detection task. The glass pipette  
443 (4–8  $\text{M}\Omega$ ) for juxtacellular recording during microstimulation task was filled  
444 with extracellular solution containing: 135 mM NaCl, 5.4 mM KCl, 1.0 mM  $\text{MgCl}_2$ ,

445 1.8 mM CaCl<sub>2</sub> and 5 mM HEPES (pH 7.2). The juxtacellular signal was amplified  
446 and low-pass filtered at 3 kHz by a patch-clamp amplifier (NPI) and sampled at  
447 25 kHz by a Power1401 data acquisition interface under the control of Spike2  
448 software (CED). For PRh recording in rats, the pipette was inserted with 17°  
449 toward lateral and 50° toward anterior. The mean depth in juxtacellular  
450 recording of S1 in mice was 1156.8±25.56 mm and of PRh in rats was 6339.64  
451 ±122.07 mm, which is likely an overestimate of the true depth due to oblique  
452 penetrations and dimpling.

453

454 **Two-photon Ca<sup>2+</sup> imaging.** For *in vivo* two-photon calcium imaging, AAV2/1-  
455 Syn-Flex-GCaMP6f-WPRE (Penn Vector Core) was injected through a glass  
456 pipette (tip diameter, 5–10 μm) into the left S1 barrel cortex on the basis of  
457 stereotaxic coordinates (AP -1.5 mm and ML 3.2 mm from bregma). A single  
458 injection (100 nl) was made at 700 μm deep from the pial surface. Three weeks  
459 after the injection, a 3-mm craniotomy was made over the injection site and  
460 sealed with a 3-mm glass coverslip (#1) with cyanoacrylate glue. A light-weight  
461 head-post was fixed on the skull in the right hemisphere with light-curing  
462 adhesives and a dental cement. Habituation of mice to head restraint and  
463 following imaging experiment begin 4 weeks after the virus injection.

464 Imaging from behaving mice was performed with a resonant-scanning  
465 two-photon microscope (Thorlabs) equipped with GaAsP photomultiplier tubes  
466 (Hamamatsu Photonics). GCaMP6f was excited at 940 nm (typically 30–40 mW  
467 at the sample) with a Ti:Sapphire laser (Mai Tai eHP Deep See, Spectra-Physics)  
468 and imaged through a 16×, 0.8 NA water immersion objective (Nikon). Full-  
469 frame images (256 × 256 pixels) were acquired from apical dendrites of L5

470 neurons expressing GCaMP6s at a depth of 150–200  $\mu\text{m}$  at 58.6 Hz using  
471 ScanImage 4.1 software (Vidrio Technologies). Tungsten electrodes for  
472 microstimulation was inserted through the access port on the chronic glass  
473 window.

474

475 **Histology.** Animals were perfused transcardially with phosphate-buffered saline  
476 (PBS) followed by 4% paraformaldehyde (PFA). Brains were removed and post-  
477 fixed for > 24 h. Coronal sections (150  $\mu\text{m}$  thick) were collected using a  
478 vibratome. For DAPI staining, NucBlue (Invitrogen) was applied to sections in  
479 PBS for 10 min. The sections were imaged with an epifluorescence microscope or  
480 a confocal microscope.

481

482 **Single-Neuron Stimulation Detection Task.** Once rats performed at current  
483 intensities below 5  $\mu\text{A}$  on 2 consecutive days, we switched to single-cell  
484 stimulation experiments, as previously described<sup>12,33</sup>. Briefly, the animals were  
485 head fixed during the task, and waited for the microstimulation/nanostimulation  
486 detection task to begin, which it did when a neuron was found. The glass pipette  
487 for juxtacellular single-cell stimulation and recording was glued to a tungsten  
488 microelectrode used for microstimulation at a distance of  $\sim 70$   $\mu\text{m}$ , as described  
489 elsewhere<sup>12,33</sup>. The glass pipette was filled with intracellular solution containing:  
490 135 mM K-gluconate; 10 mM HEPES; 10 mM Na<sub>2</sub>-phosphocreatine; 4 mM KCl; 4  
491 mM MgATP; and 0.3 mM Na<sub>3</sub>GTP (pH 7.2). Recording depth was  $1902 \pm 60.73$   
492  $\mu\text{m}$ , which is likely an overestimate of the true depth due to oblique  
493 penetrations and dimpling.

494 During single-cell stimulation trials, a fixed duration square-wave current pulse  
495 was injected into a neuron through a glass pipette. Every stimulation sequence  
496 contained each step exactly once, while their order was varied pseudo-randomly  
497 from trial to trial. To induce a regular spike pattern, we used a single 100 ms DC  
498 current step. To elicit burst like spike pattern, brief stimulation duration of 25  
499 ms was used, followed by 1175 ms inhibition at current intensities of 50% used  
500 in the nanostimulation, to prevent any further spikes during the stimulation trial.  
501 Single-cell stimulation trials, catch trials without current injection and  
502 microstimulation trials were pseudo randomly interleaved in series of 6 trials  
503 including 3 microstimulation trials, 2 single-cell stimulation trials (each of  
504 different duration) and 1 catch trial. All trials were presented at random  
505 intervals (Poisson process, mean 3 s). Microstimulation currents were adjusted  
506 (range 3-8  $\mu$ A, mean  $4.2 \pm 1.1 \mu$ A (s.d.)) such that animals performed close to the  
507 detection threshold, resulting in an average microstimulation hit rate of 90%.

508

509 **Data analysis and statistics.** Recorded neurons were separated into putative  
510 fast-spiking (FS) interneurons and regular-spiking (RS) pyramidal neurons  
511 based on spike half-width and firing rate. Cells with spike half-width lower than  
512 0.5 ms and firing rate higher than 8 Hz were classified to FS. Only RS were used  
513 for further analysis.

514 All the cells and trials recorded over days were pooled together for  
515 comparing activity (firing rate or burst rate) changes during miss and hit trials.  
516 Bursts were identified as at least two spikes with an inter-spike interval of  $\leq 15$   
517 ms. Time window between 1 and 0 s before the stimulus ([-1 0] s) was used to  
518 calculate the baseline activity and 0.5 – 2.5 s ([+0.5 +2.5] s) after stimulus was

519 used to calculate post-stimulus activity. For firing rate and burst rate change  
520 analysis, difference between pre-stimulus frequency and post-stimulus  
521 frequency was divided by average pre-stimulus frequency.

522 All analysis for Ca<sup>2+</sup> imaging was performed using imageJ and custom  
523 written codes in Matlab. Horizontal and vertical drifts of imaging frames due to  
524 animal motion were corrected by registering each frame to a reference image  
525 based on whole-frame cross-correlation. The reference image was generated by  
526 averaging any given consecutive 100 frames in which motion drifts were  
527 minimal. Regions of interest (ROIs) for apical dendrites of L5 neurons were  
528 manually selected with the help of average intensity and standard deviation  
529 projections across movie frames. For each ROI, pixel values inside the ROI were  
530 averaged to obtain the time series of Ca<sup>2+</sup> fluorescence. The extracted signals  
531 were corrected for neuropil contamination by subtracting the local, peri-  
532 dendritic neuropil signals. Fluorescence change ( $\Delta F/F_0$ ) was calculated as  
533  $(F - F_0)/F_0$ , where  $F_0$  was the baseline fluorescence value in the ROI throughout  
534 the whole imaging session.

535 For local field potential (LFP) analysis, juxtacellularly recorded voltages  
536 were band-pass filtered at 4-30 Hz and a power spectrum was calculated using  
537 the Stockwell Transform<sup>34,35</sup>, over a 2 s period before stimulus onset and 5 s  
538 period afterwards. In order to avoid potential artifacts caused by stimulation, the  
539 analysis was restricted to microstimulation or nanostimulation trials where the  
540 following trial occurred more than 5 s after stimulus onset. The power spectrum  
541 was calculated separately for individual trials and its absolute magnitude  
542 averaged within the different response categories (hits and misses). To obtain



543 the population spectra for the different response categories the power spectra of  
544 individual trials were then averaged.

545 For the classification of cells, peri-stimulus time-histograms (PSTHs)  
546 were calculated for each cell by averaging spikes in time bins of 100 ms for times  
547 within 2 seconds of hit-trials. For each cell, the stationary rate and standard  
548 deviation were computed based on the PSTHs in the period [-2,0] s. Cells were  
549 classified to ON cell or OFF cell if PSTHs in the period [0.3,0.4] s was either more  
550 than 3\*standard deviation (SD) above the stationary rate, or less than 3\*SD  
551 below, respectively. Other cells were classified as NR cells. Similarly, dendrites  
552 were classified into ON, OFF and NR dendrites.

553 Unless otherwise stated, all values are indicated as mean  $\pm$  SEM. Shapiro-  
554 Wilk test was performed to test normality of the data. For non-parametric test,  
555 significance was determined using Wilcoxon signed-rank test within group and  
556 Wilcoxon rank-sum test between groups at a significance level of 0.05. No  
557 statistical tests were run to predetermine sample size, and blinding and  
558 randomization were not performed.

559

560

561

562

563

564

565

566

567

568 **References**

- 569 32. Madisen, L. *et al.* A toolbox of Cre-dependent optogenetic transgenic mice  
570 for light-induced activation and silencing. *Nat. Neurosci.* **15**, 793–802  
571 (2012).
- 572 33. Voigt, B. C., Brecht, M. & Houweling, A. R. Behavioral detectability of single-  
573 cell stimulation in the ventral posterior medial nucleus of the thalamus. *J.*  
574 *Neurosci.* **28**, 12362–7 (2008).
- 575 34. Stockwell, R. G., Mansinha, L. & Lowe, R. P. Localization of the complex  
576 spectrum: the S transform. *IEEE Trans. Signal Process.* **44**, 998–1001  
577 (1996).
- 578 35. Ari, S., Das, M. K. & Chacko, A. ECG signal enhancement using S-Transform.  
579 *Comput. Biol. Med.* **43**, 649–660 (2013).

580

581

582

583

584

585

586

587

588

589

590

591

592

593

594 **Main figures**

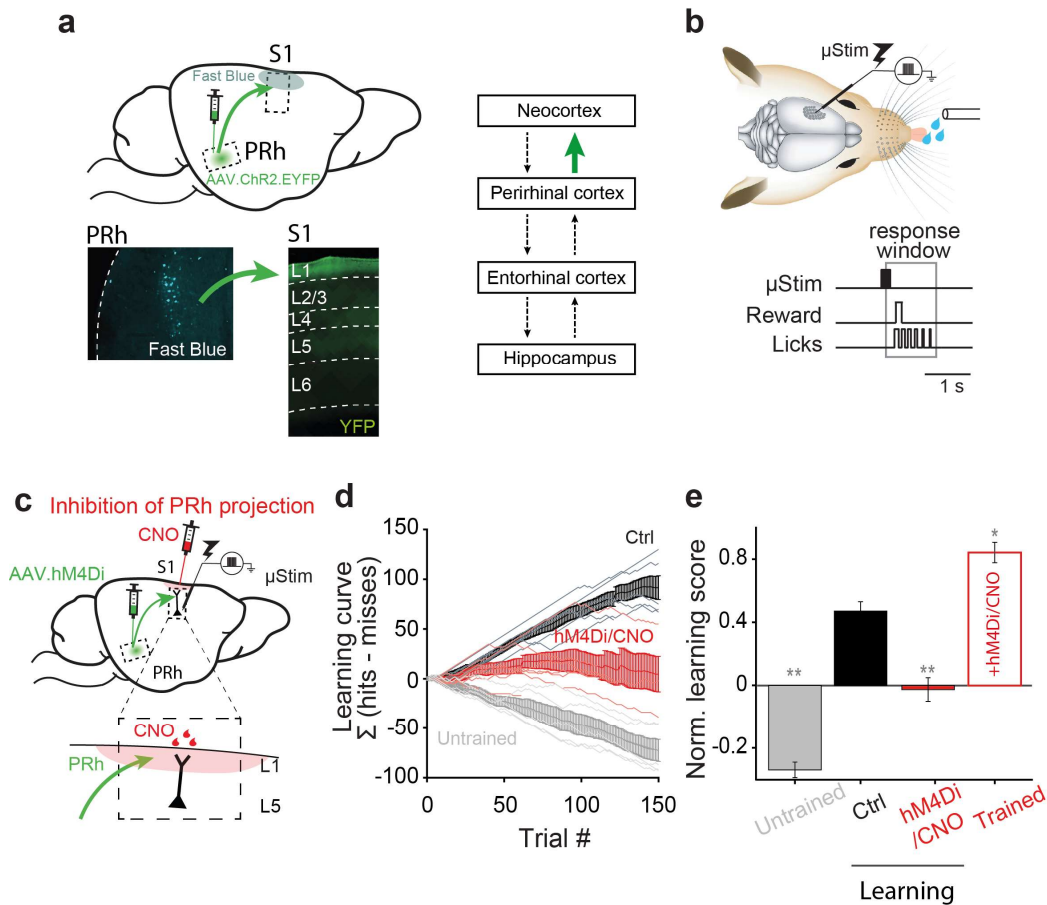

595

596 **Figure 1 | Perirhinal projection to neocortical L1 is necessary for learning a**

597  **$\mu$ Stim task.** **a**, Left, sagittal view of the rodent brain showing perirhinal

598 projection to primary somatosensory cortex (S1). Lower left, retrograde tracing.

599 Deep layer neurons in perirhinal cortex (PRh) were labeled with Fast Blue after

600 application of dye to L1 of S1. Lower right, anterograde tracing. Chr2/EYFP

601 labeled axons of PRh project strongly to L1 of S1. Right, simplified connectivity

602 map between the neocortex, perirhinal cortex, entorhinal cortex and

603 hippocampus. Investigated connection is highlighted in green. Note that not

604 all the connections are shown here. **b**, Schematic of  $\mu$ Stim detection task. Tungsten

605 electrode was placed in L5 of S1. Animals learned to respond by licking within a

606 1.1-s window following  $\mu$ Stim. **c**, Schematic of chemogenetic silencing of PRh

607 axons in L1 of S1 during  $\mu$ Stim task. AAV.hM4Di was injected to PRh and CNO

608 was applied in superficial layer of S1 before  $\mu$ Stim task (see Methods). Inset,

609 enlarged view of superficial layer of S1. Red shade represents CNO effective area.

610 **d**, Cumulative learning curve of control mice (black), mice with PRh axonal

611 suppression (hM4Di; red) and untrained mice (grey) during 150 trials in the first  
 612 session. Light lines represent individual mouse. Bold lines with error bars  
 613 represent the mean and SEM, respectively, of each group. **e**, Last value of  
 614 cumulative learning curve normalized by total number of trials (Norm. learning  
 615 score) during learning and after learning (Trained). Wilcoxon rank-sum test  
 616 against control, \* $p < 0.05$ , \*\* $p < 0.01$ .  
 617

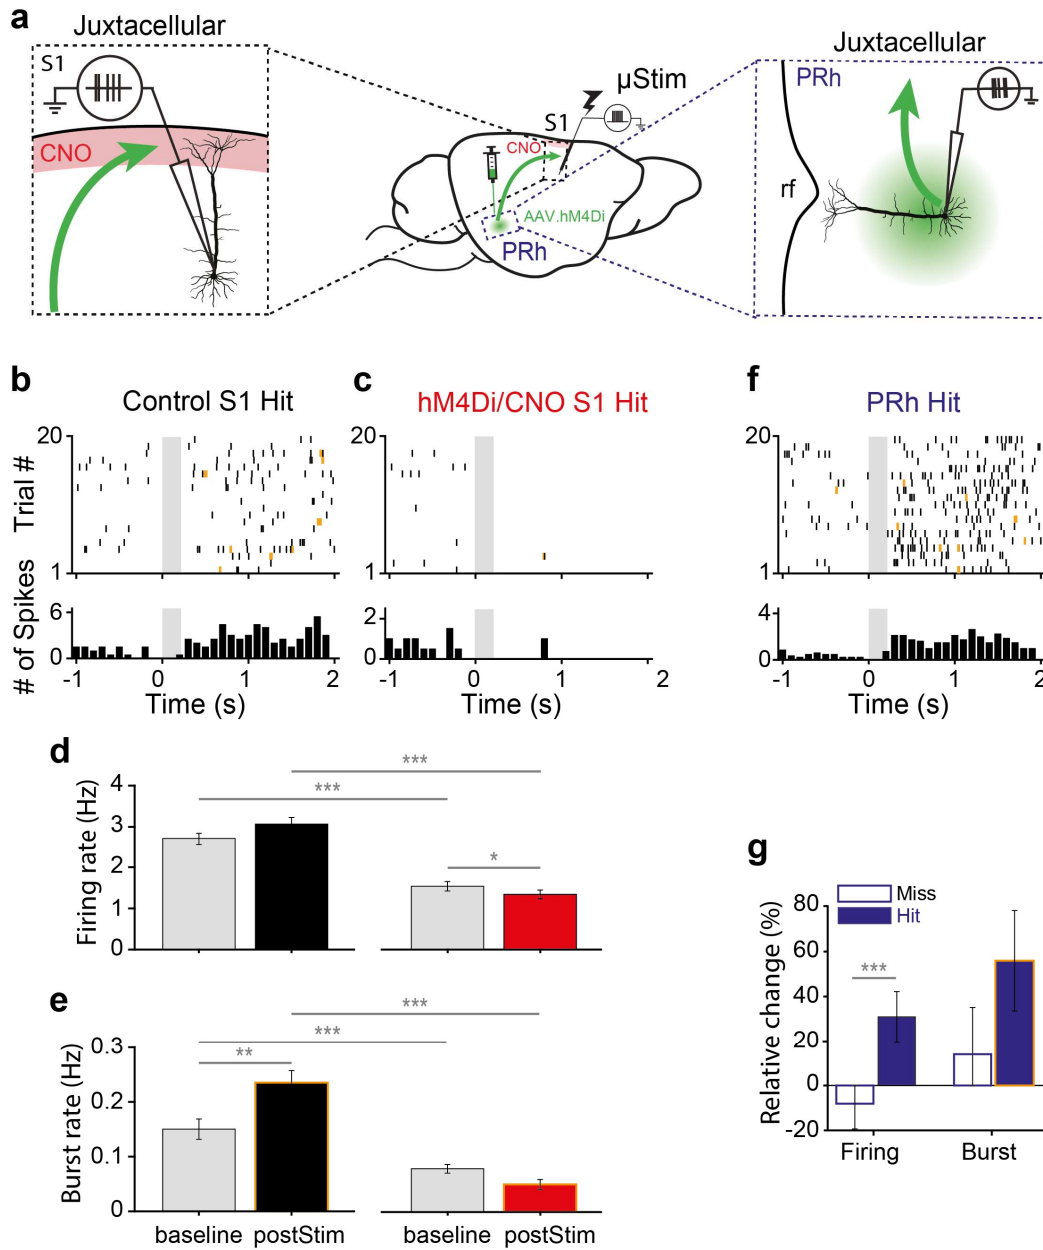

618

619

620 **Figure 2 | Learning-induced burst firing in layer 5 pyramidal neurons in S1**  
 621 **is PRh-dependent. a**, Schematic of juxtacellular recording of L5 pyramidal  
 622 neurons in S1 (left) and deep layer pyramidal neurons in PRh (right). Red shade:  
 623 CNO targeted area, rf: rhinal fissure. **b, c**, Representative raster plot (upper) and  
 624 PSTH (lower) during hit trials in L5 pyramidal neurons in control S1 and hM4Di  
 625 S1, respectively. Bursts are marked by yellow ticks in the raster plot. Gray box:  
 626  $\mu$ Stim. Note that y-axis scales differ for visibility. **d, e** Firing rate and burst rate  
 627 during hit trials in control S1 and in hM4Di S1, respectively. **f**, Representative  
 628 raster plot (upper) and PSTH (lower) during hit trials in perirhinal neuron. **g**,  
 629 Relative change of firing rate and burst rate during miss and hit trials from PRh  
 630 neurons. \* $p < 0.05$ , \*\* $p < 0.01$ , \*\*\* $p < 0.001$ .

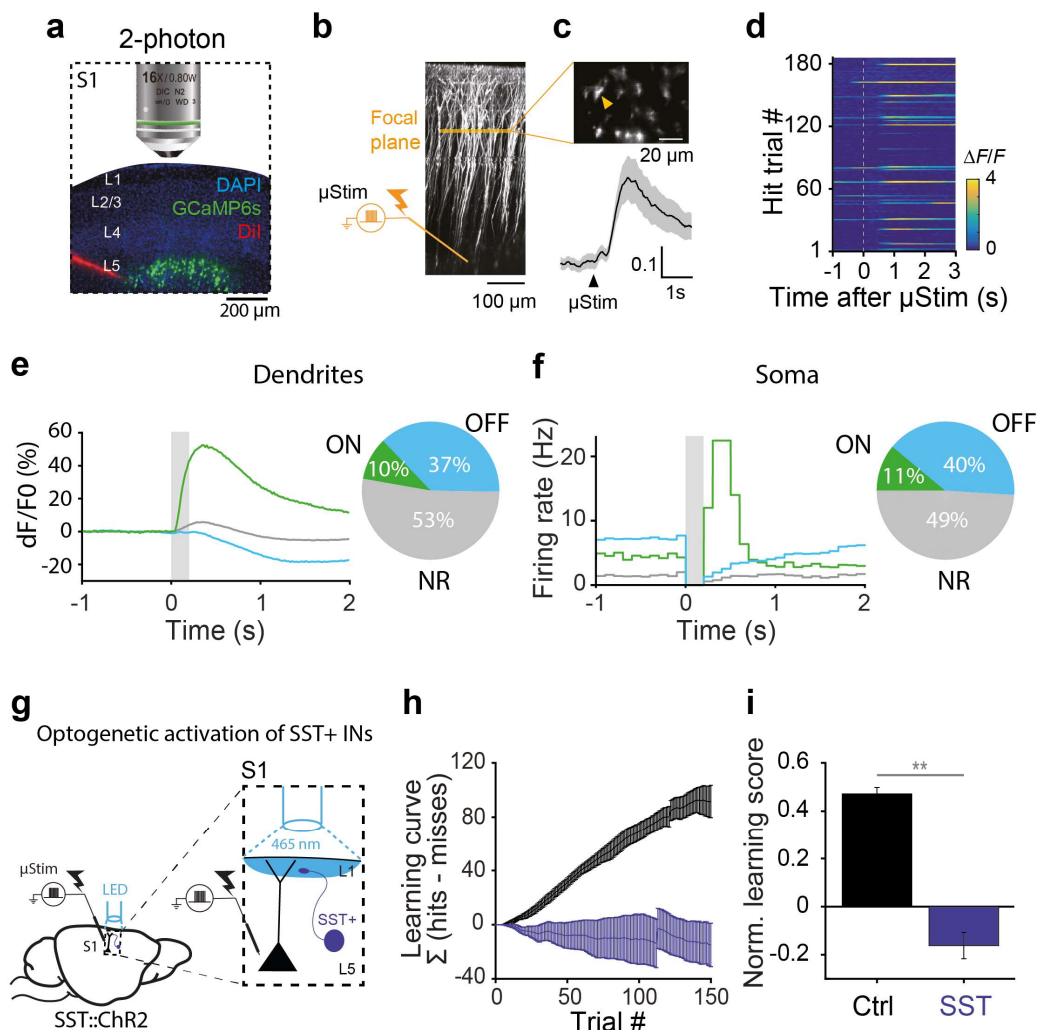

631

632 **Figure 3 | Dendritic activity-dependent emergence of distinct L5**  
633 **subpopulations after learning. a**, Two-photon Ca<sup>2+</sup> imaging from the apical  
634 dendrites of L5 pyramidal neurons in Rbp4-cre mice during  $\mu$ Stim task. DiI  
635 shows the location of  $\mu$ Stim electrode. **b**, Z-stack image of recorded dendrites  
636 and  $\mu$ Stim electrode in L5. **c**, Horizontal imaging plane (upper) ( $\sim$ 200  $\mu$ m from  
637 pia) and average Ca<sup>2+</sup> responses (lower) for all trials from a dendrite marked  
638 with a yellow arrow. **d**, Ca<sup>2+</sup> responses in an apical dendrite marked in **c**. during  
639 180 trials of  $\mu$ Stim task. **e**, Left, Average peri-stimulus time Ca<sup>2+</sup> responses in ON,  
640 OFF and NR dendrites (total n=318 dendrites) during hit trials (See Methods for  
641 classification criteria). Gray box:  $\mu$ Stim. Right, the fraction of ON, OFF and NS  
642 dendrites. **f**, Left, Average PSTH of L5<sup>ON</sup>, L5<sup>OFF</sup> and L5<sup>NR</sup> neurons (total n=272  
643 cells) during hit trials (See Methods for classification criteria). Gray box:  $\mu$ Stim.  
644 Right, the fraction of L5<sup>ON</sup>, L5<sup>OFF</sup> and L5<sup>NR</sup> neurons. **g**, Schematic of optogenetic  
645 activation of SST+ interneurons during  $\mu$ Stim task in SST::ChR2 mice. Blue light  
646 (465 nm) was shed on the surface of the craniotomy (See Methods). Inset,  
647 magnified view of the targeted circuit in S1. **h**, Cumulative learning curve of  
648 control (n=6, black) and SST::ChR2 mice (n=6, dark blue) during the first session.  
649 **i**, Normalized learning score of control and SST::ChR2 mice at the first session.  
650 Wilcoxon rank-sum test, \*\* p<0.01.  
651

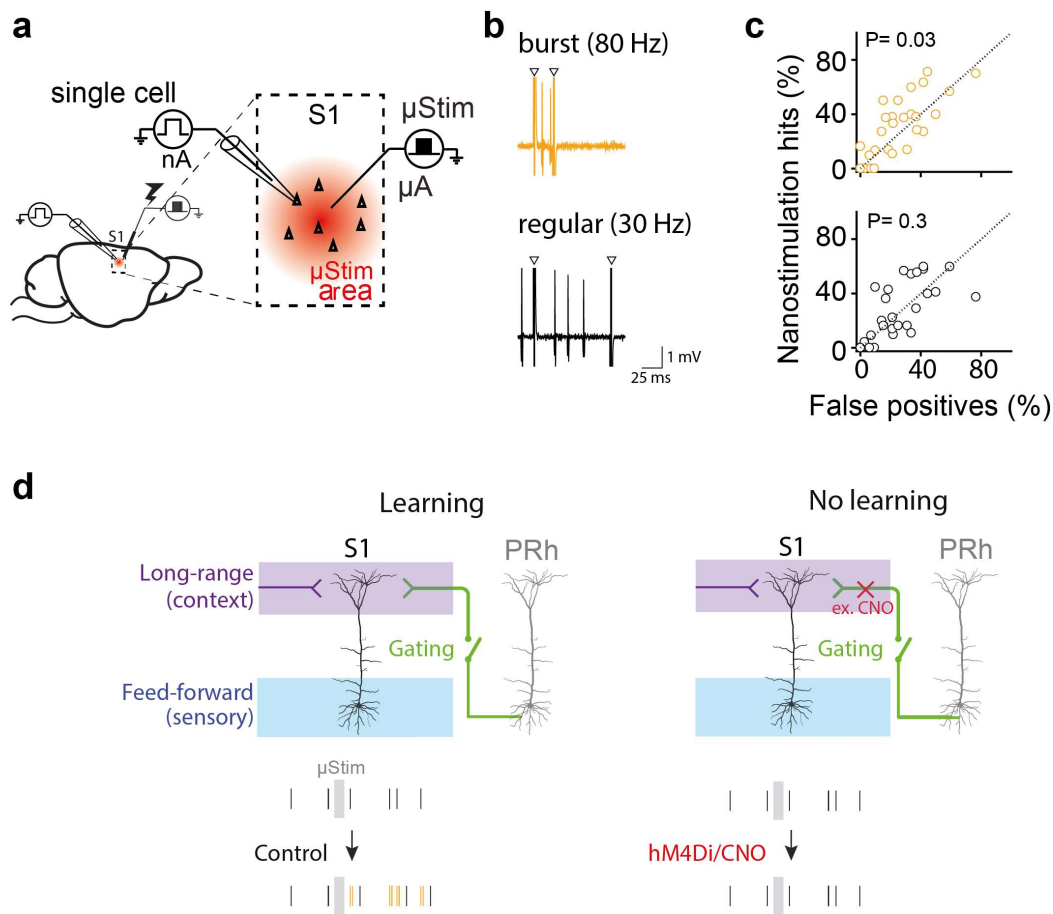

652

653 **Figure 4 | Burst firing in single L5 pyramidal neurons can retrieve learned**  
 654 **behavior.** **a**, Schematic of single-cell stimulation. Inset,  $\mu$ Stim stimulates a  
 655 population of neurons surrounding electrode (red shade) and glass electrode  
 656 stimulates a single neuron (triangle). **b**, Current injection protocol to induce  
 657 either regular AP firing (30 Hz, black) or high frequency (80-120 Hz, yellow)  
 658 bursts in single cells. **c**, Response rates (hits) for regular AP firing (black) or  
 659 burst firing (yellow) trials versus false-positive trials (n=27 cells). One-sided  
 660 paired t-test. **d**, Gating theory of memory formation in cortex. PRh inputs to L1  
 661 gate long-range inputs that modulate the firing mode of L5 pyramidal neurons in  
 662 S1 and learning.
